# Supplementary material for: Improving the performance of kesterite solar cells by solution germanium alloying
Source: Royal Society of Chemistry journal article supplement (doi:10.1039/d4cp02398f), 2024-01-01
Supplement: d4cp02398f1.pdf [file d4cp02398f1.pdf]

## **Improving the performance of kesterite solar cells by solution**

### **germanium alloying**

Sitong Xiang, Yize Li, Chunxu Xiang, Hongkun Liu, Yuanyuan Zheng, Shaoying Wang\*, Weibo Yan\* and Hao Xin\*

Key Laboratory for Organic Electronics and Information Displays & Jiangsu Key Laboratory for Biosensors, Institute of Advanced Materials (IAM), Jiangsu National Synergetic Innovation Center for Advanced Materials (SICAM), Nanjing University of Posts & Telecommunications, 9 Wenyuan Road, Nanjing 210023, China.

Correspondence: [iamhxin@njupt.edu.cn](mailto:iamhxin@njupt.edu.cn)

Table S1. Elemental analysis of compounds.

| Sample                                | C [wt.%] | H [wt.%] | S [wt.%] |
|---------------------------------------|----------|----------|----------|
| compound                              | 12.34    | 3.405    | 15.272   |
| Ge(DMSO) <sub>2</sub> Cl <sub>4</sub> | 12.97    | 3.24     | 17.297   |

Table S2. The diffraction angle, FWHM of (112) diffraction peak, and crystalline domain size of samples.

| Sample     | 2-theta (°) | FWHM (°) | Grain Size (nm) |
|------------|-------------|----------|-----------------|
| CZTSSe     | 27.498      | 0.183    | 53.6            |
| CZTGSSe-10 | 27.522      | 0.219    | 42.1            |
| CZTGSSe-15 | 27.579      | 0.226    | 40.4            |
| CZTGSSe-20 | 27.614      | 0.228    | 40.0            |
| CZTGSSe-40 | 27.709      | 0.255    | 35.0            |
| CZGSSe     | 27.947      | 0.136    | 88.1            |

Table S3. Lattice parameters and cell volume of the absorbers.

| Sample     | a (Å) | c (Å)  | vol (Å <sup>3</sup> ) |
|------------|-------|--------|-----------------------|
| CZTS       | 5.632 | 11.156 | 353.835               |
| CZTGSSe-10 | 5.626 | 11.150 | 352.926               |
| CZTGSSe-15 | 5.615 | 11.124 | 350.786               |
| CZTGSSe-20 | 5.613 | 11.094 | 349.491               |
| CZTGSSe-40 | 5.589 | 11.076 | 345.965               |
| CZGSSe     | 5.544 | 10.975 | 337.377               |

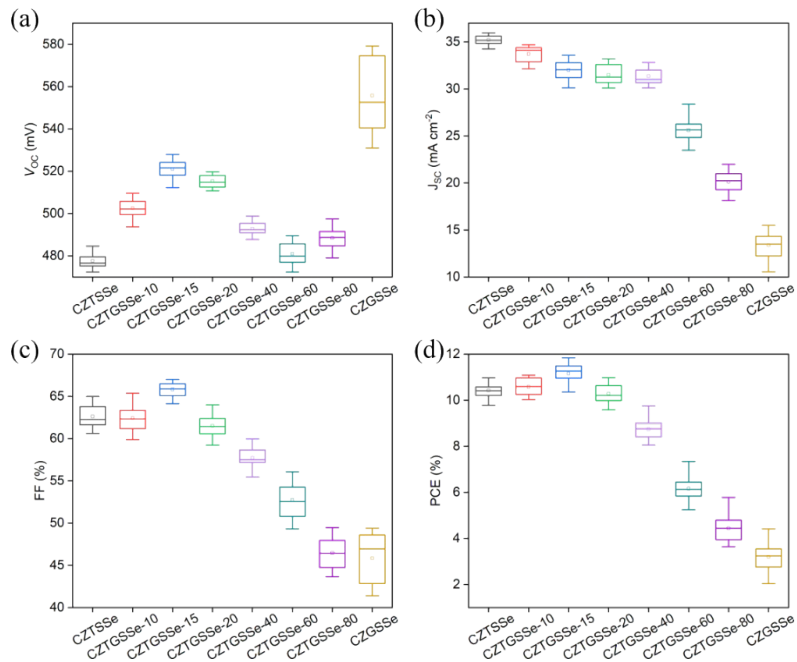

Figure S1. Statistical device parameters of kesterite solar cells with a whole concentration.

Table S4 Device characteristics of CZTSSe, CZTGSSe-n and CZGSSe solar cells.

| Sample     | $V_{OC}$<br>(mV) | $J_{SC}$<br>(mA/cm <sup>2</sup> ) | FF<br>(%) | PCE<br>(%) | $R_s$<br>( $\Omega$ cm <sup>2</sup> ) | $E_g$<br>(eV) | $V_{OC}/V_{OC}^{SQ}$ |
|------------|------------------|-----------------------------------|-----------|------------|---------------------------------------|---------------|----------------------|
| CZTS       | 477.4            | 35.36                             | 64.99     | 10.97      | 2.041                                 | 1.081         | 0.568                |
| CZTGSSe-10 | 508.8            | 34.71                             | 62.34     | 11.01      | 2.381                                 | 1.094         | 0.597                |
| CZTGSSe-15 | 519.3            | 33.05                             | 65.64     | 11.27      | 2.248                                 | 1.128         | 0.587                |
| CZTGSSe-20 | 519.1            | 33.05                             | 60.72     | 10.42      | 2.793                                 | 1.132         | 0.584                |
| CZTGSSe-40 | 496.7            | 32.81                             | 58.94     | 9.61       | 3.130                                 | 1.142         | 0.553                |
| CZGSSe     | 577.4            | 15.48                             | 49.4      | 4.41       | 15.510                                | 1.517         | 0.463                |

Table S5. Average device characteristics of CZTSSe, CZTGSSe-n and CZGSSe solar cells.

| Sample     | $V_{OC}$ (mV) | $J_{SC}$ (mA/cm <sup>2</sup> ) | FF (%)      | PCE (%)     |
|------------|---------------|--------------------------------|-------------|-------------|
| CZTS       | 477.6 ± 3.6   | 35.21 ± 0.5                    | 62.63 ± 1.3 | 10.42 ± 0.3 |
| CZTGSSe-10 | 502.5 ± 4.0   | 33.71 ± 0.9                    | 62.42 ± 1.5 | 10.58 ± 0.3 |
| CZTGSSe-15 | 521.0 ± 4.2   | 32.00 ± 0.9                    | 65.82 ± 0.8 | 11.15 ± 0.4 |
| CZTGSSe-20 | 515.3 ± 3.2   | 31.50 ± 1.1                    | 61.51 ± 1.2 | 10.29 ± 0.4 |
| CZTGSSe-40 | 492.8 ± 2.9   | 31.34 ± 0.8                    | 57.70 ± 1.1 | 8.74 ± 0.4  |
| CZGSSe     | 555.7 ± 16.9  | 13.39 ± 1.3                    | 45.83 ± 2.8 | 3.20 ± 0.6  |

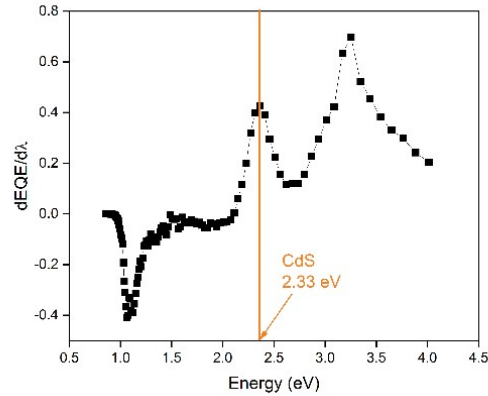

Figure S2. The bandgap of CdS obtained by differentiation based on EQE data.

The bandgap of CdS is estimated by plotting  $dEQE/d\lambda$  versus energy, three peaks represent the absorber, cadmium sulfide (CdS) buffer layer, and window layer respectively, with a bandgap of 2.33eV in the buffer layer.

Table S6. Device characteristics of CZTGSSe-15 and ACZTGSSe-15 solar cells.

| Cell        | $V_{OC}$<br>(mV) | $J_{SC}$<br>(mA cm <sup>-2</sup> ) | FF<br>(%) | PCE<br>(%) | $R_s$<br>( $\Omega$ cm <sup>2</sup> ) | n    | $J_0$<br>(A cm <sup>-2</sup> ) | $E_U$<br>(meV) | $E_g$<br>(eV) | $V_{OC}/V_{OC}^{SQ}$ |
|-------------|------------------|------------------------------------|-----------|------------|---------------------------------------|------|--------------------------------|----------------|---------------|----------------------|
| CZTGSSe-15  | 522.3            | 33.24                              | 65.16     | 11.31      | 2.253                                 | 1.81 | 4.15×10 <sup>-7</sup>          | 24.7           | 1.129         | 0.589                |
| ACZTGSSe-15 | 523.8            | 35.87                              | 65.22     | 12.25      | 2.139                                 | 1.56 | 7.40×10 <sup>-8</sup>          | 23.8           | 1.131         | 0.590                |
